# Supplementary material for: Impact of Individual, Familial and Parental Factors on Adolescent Smoking in Turkey
Source: MDPI journal article supplement (doi:10.3390/ijerph18073740), 2021-04-02
Supplement: s1 [file s1]

**Table S1:** Parental attitudes according to gender of the students.

| Gender | Mother Parental attitudes<br>Mean $\pm$ SD | Father parental attitudes<br>Mean $\pm$ SD |                                           |                                   |
|--------|--------------------------------------------|--------------------------------------------|-------------------------------------------|-----------------------------------|
|        |                                            | Democratic<br>48.33 $\pm$ 11.03            | Protective Demanding<br>41.81 $\pm$ 12.02 | Authoritarian<br>25.72 $\pm$ 9.03 |
| Boys   | Democratic<br>49.09 $\pm$ 11.04            | 0.82*, 0.00                                | 0.46*, 0.00                               | 0.28*, 0.00                       |
|        | Protective Demanding<br>42.29 $\pm$ 11.98  | 0.52*, 0.00                                | 0.91*, 0.00                               | 0.77*, 0.00                       |
|        | Authoritarian<br>25.25 $\pm$ 9.24          | 0.35*, 0.00                                | 0.81*, 0.00                               | 0.91*, 0.00                       |
| Girls  | Democratic<br>49.09 $\pm$ 10.32            | Democratic<br>49.09 $\pm$ 10.32            | Protective Demanding<br>39.92 $\pm$ 11.25 | Authoritarian<br>23.54 $\pm$ 8.75 |
|        | Democratic<br>50.03 $\pm$ 10.62            | 0.83*, 0.00                                | 0.19*, 0.00                               | -0.02, 0.57                       |
|        | Protective Demanding<br>40.68 $\pm$ 10.97  | 0.23*, 0.00                                | 0.89*, 0.00                               | 0.78*, 0.00                       |
|        | Authoritarian<br>23.16 $\pm$ 8.95          | 0.02, 0.65                                 | 0.75*, 0.00                               | 0.91*, 0.00                       |

\*  $p < 0.05$
